# Supplementary material
Source: Royal Society of Chemistry journal article supplement (doi:10.1039/d6bm00169f)

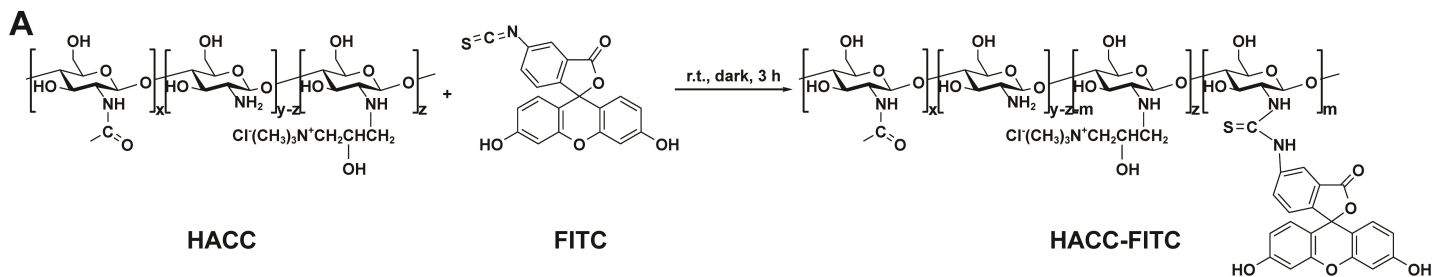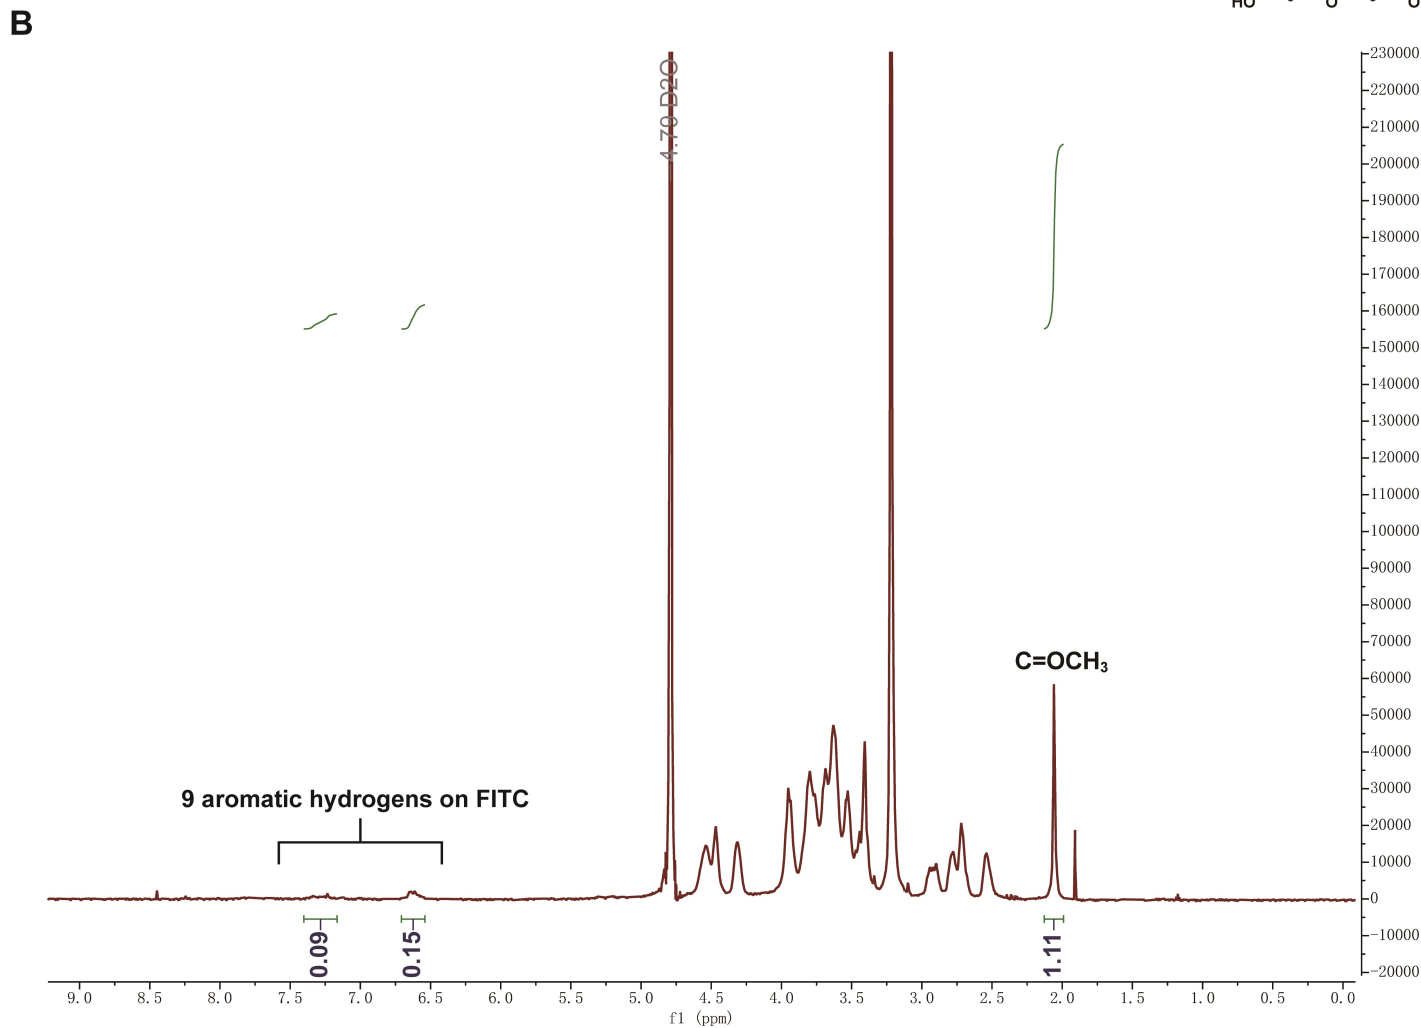

Supplement: d6bm00169f7.pdf [file d6bm00169f7.pdf]

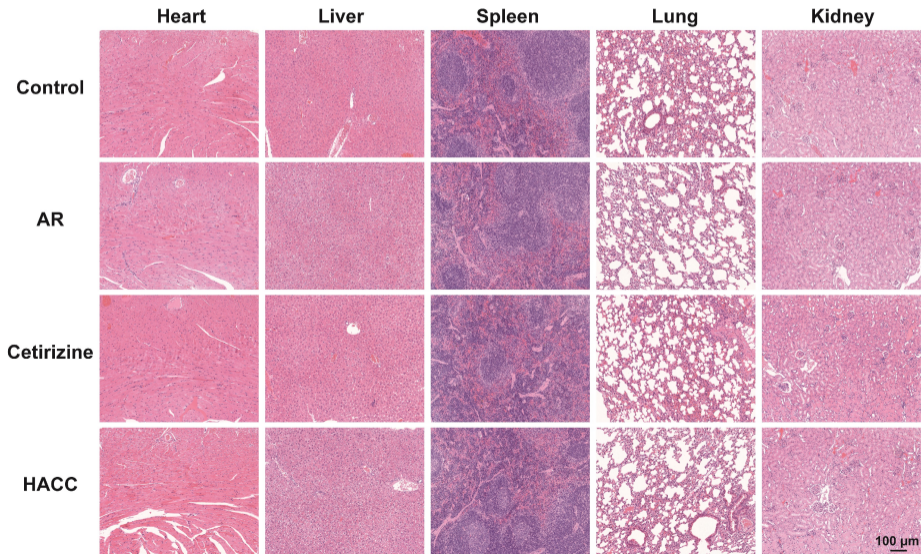

Supplement: d6bm00169f9.pdf [file d6bm00169f9.pdf]
